# Supplementary material
Source: HighWire-hosted journal article supplement (https://bjsm.bmj.com/content/bjsports-2023-106931)
Supplement: inline-supplementary-material-4 [file inline-supplementary-material-4.pdf]

#### Appendix 4. ACLOAS Grades on MRI at 3 and 6-month follow-up (complete case analysis)

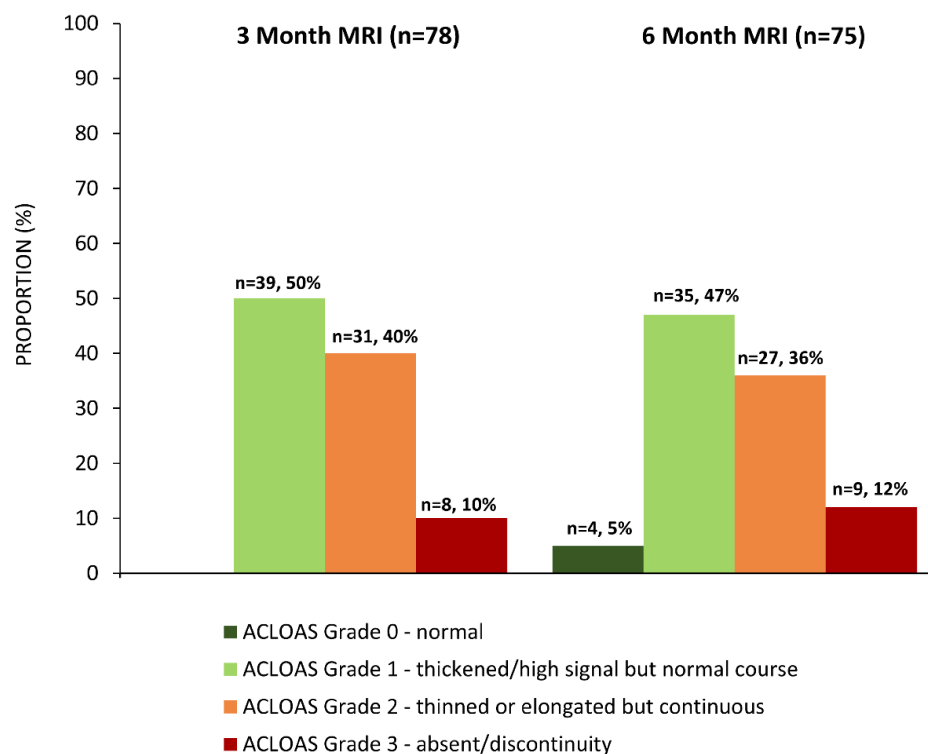

Figure 1: MRI evidence of ACL healing at 3- and 6-month follow-up

There is missing data from n=2 at 3 months (decided not to undergo MRI, n=2), and n=6 at 6 months (due to ACL re-rupture (n=3), pregnancy (n=1), or decided not to undergo MRI (n=2))
